# Supplementary material for: Commonalities in the Features of Cancer and Chronic Fatigue Syndrome (CFS): Evidence for Stress-Induced Phenotype Instability?
Source: MDPI journal article supplement (doi:10.3390/ijms23020691), 2022-01-08
Supplement: s1 [file s1]

| ARTICLE              | DISEASE/PROCESS | SYNOPSIS/KEY FINDINGS                                                                                                                                                                                                                                                                                                                                                                                                                                                                                                                                                                                                                                                        |
|----------------------|-----------------|------------------------------------------------------------------------------------------------------------------------------------------------------------------------------------------------------------------------------------------------------------------------------------------------------------------------------------------------------------------------------------------------------------------------------------------------------------------------------------------------------------------------------------------------------------------------------------------------------------------------------------------------------------------------------|
| Servaes et al. 2001  | CFS/CRF         | <ul style="list-style-type: none"> <li>-study examining CFS and CRF patients</li> <li>-19% of disease-free cancer patients are fatigued</li> <li>-no relationship between fatigue and type of cancer</li> <li>-fatigue associated with lower motivation, concentration, physical activity</li> <li>-relation between fatigue, depression, and anxiety</li> <li>-similar "fatigue experience" between CRF and CFS</li> </ul>                                                                                                                                                                                                                                                  |
| Stussman et al. 2020 | CFS             | <ul style="list-style-type: none"> <li>-study examining CFS patients</li> <li>-range of symptoms attributed to exertion</li> <li>-core symptoms: exhaustion, cognitive difficulties, neuromuscular complaints</li> <li>-unique variations particular to different individuals</li> <li>-post-exertional malaise varies greatly between individuals and causes a reduced quality of life</li> </ul>                                                                                                                                                                                                                                                                           |
| Park et al. 2019     | CFS/CRF         | <ul style="list-style-type: none"> <li>-study examining CFS and CRF patients</li> <li>-both CFS/CRF patients show comparable levels of fatigue but different presentation</li> <li>-CRF patients had higher high sensitivity C-reactive protein (hs-CRP) levels and reduced heart rate variability (HRV)-index</li> <li>-different pathophysiological mechanisms underlie CFS and CRF; inflammatory markers and EEG markers may distinguish the diseases</li> </ul>                                                                                                                                                                                                          |
| Franc et al. 2014    | CRF             | <ul style="list-style-type: none"> <li>-fatigue affects many with cancer</li> <li>-often diagnosed during treatment</li> <li>-oftentimes the feeling is specific to the individual and may be subjective</li> <li>-pathogenesis is unknown still</li> <li>-CRF causes reduced quality of life</li> <li>-treatment may be attempted based on the suspected underlying cause</li> </ul>                                                                                                                                                                                                                                                                                        |
| Ryan et al. 2007     | CRF             | <ul style="list-style-type: none"> <li>-review about the suspected mechanisms of cancer-related fatigue</li> <li>-very prevalent in cancer patients with a large effect on quality of life</li> <li>-still poorly understood and may involve contributions from comorbid disorders, therapy, or cancer itself</li> <li>-suspected to often involve dysregulation of several physiological and biochemical systems</li> <li>-may include dysregulation of several systems: HPA axis, 5-HT, ATP metabolism, circadian rhythms, cytokine dysregulation, and muscle alterations</li> <li>-however, still very little evidence directly linking these processes to CRF</li> </ul> |
| Saligan et al. 2015  | CRF             | <ul style="list-style-type: none"> <li>-systematic review paper of current literature on cancer-related fatigue</li> </ul>                                                                                                                                                                                                                                                                                                                                                                                                                                                                                                                                                   |

|                            |             |                                                                                                                                                                                                                                                                                                                                                                                                                                                                 |
|----------------------------|-------------|-----------------------------------------------------------------------------------------------------------------------------------------------------------------------------------------------------------------------------------------------------------------------------------------------------------------------------------------------------------------------------------------------------------------------------------------------------------------|
|                            |             | <ul style="list-style-type: none"> <li>-47 current articles reviewed; 25 cross-sectional and 22 longitudinal</li> <li>-findings suggest that CRF is linked to immune/inflammatory, genetic, neuroendocrine, and metabolic markers</li> <li>-gaps exist in current research</li> </ul>                                                                                                                                                                           |
| Berger et al. 1998         | CRF         | <ul style="list-style-type: none"> <li>-study of CRF in breast cancer patients, specifically related to adjuvant therapy (chemotherapy)</li> <li>-the study found unexpected variance in reported fatigue over the course of the treatment cycle, peaking during treatment and waning at midpoints</li> </ul>                                                                                                                                                   |
| Jereczek-Fossa et al. 2002 | CRF         | <ul style="list-style-type: none"> <li>-radiotherapy-induced fatigue is very common in patients undergoing radiation therapy</li> <li>-poorly understood etiology</li> <li>-may depend on site of tumor and treatment regime</li> <li>-psychological mechanisms have been proposed</li> <li>-some potential treatments include group psychotherapy, relaxation therapy, exercise, and sleep</li> </ul>                                                          |
| Kamal et al. 2019          | CRF         | <ul style="list-style-type: none"> <li>-a study using dosimetric data from disease-free nasopharyngeal cancer patients</li> <li>-dosimetric data obtained from several regions in the brains following radiation therapy</li> <li>-a “dose-fatigue” relationship is present for the pituitary gland, determined through patient and observer reporting</li> </ul>                                                                                               |
| McManimen et al. 2016      | CFS         | <ul style="list-style-type: none"> <li>-study to determine if CFS patients die earlier than the rest of the population from the cause—56 cases were examined</li> <li>-significantly increased risk of earlier all-cause death, cardiovascular-related mortality</li> <li>-directionally lower age of death for suicide and cancer</li> <li>-findings should be replicated due to sample size of the study and the use of only severely ill patients</li> </ul> |
| Levine et al. 2011         | CFS, Cancer | <ul style="list-style-type: none"> <li>-attempt to use population-based data to determine relationship between cancer and CFS, if any</li> <li>-some evidence of increased non-Hodgkin lymphoma (NHL). however this needs follow-up studies</li> <li>-not all CFS patients exhibit immune dysregulation, and a single causative agent is highly unlikely between both diseases</li> <li>-focusing on subgroups in each disease may prove more useful</li> </ul> |
| Levine et al. 1994         | CFS, Cancer | <ul style="list-style-type: none"> <li>-CFS has been associated with immune dysregulation in the past, however this is very contentious in the literature</li> </ul>                                                                                                                                                                                                                                                                                            |

|                     |            |                                                                                                                                                                                                                                                                                                                                                                                                                                                                                                                                                                                                                                                                 |
|---------------------|------------|-----------------------------------------------------------------------------------------------------------------------------------------------------------------------------------------------------------------------------------------------------------------------------------------------------------------------------------------------------------------------------------------------------------------------------------------------------------------------------------------------------------------------------------------------------------------------------------------------------------------------------------------------------------------|
|                     |            | <ul style="list-style-type: none"> <li>-it is difficult to warrant association of CFS with cancer given the then-current data</li> <li>-no consistent trends associating NHL with CFS</li> <li>-upward trend in the incidence of CNS tumors may be related to a general increase in cases in the general population</li> <li>-several recommendations given for later studies, including latent period for specific tumors</li> </ul>                                                                                                                                                                                                                           |
| Servaes et al. 2002 | CFS/CRF    | <ul style="list-style-type: none"> <li>-study of 57 severely fatigued but disease-free breast cancer patients and in 57 gender and age matched patients with CFS</li> <li>-CFS patients tend to self-report worse level of fatigue, functional impairment, physical pain, pain, and efficacy</li> <li>-a subgroup of severely fatigued breast cancer patients scored equally to the CFS patients</li> <li>-some similarities between the patient groups but also a great deal of differences—cognitive-behavioural therapy should differ between the patient groups</li> </ul>                                                                                  |
| Chang et al. 2012   | CFS/Cancer | <ul style="list-style-type: none"> <li>-epidemiological study on 1.2 cancer cases</li> <li>-sought to determine whether CFS can be linked to cancer based on the hypothesis of immune dysfunction and metabolic dysregulation</li> <li>-CFS seems to be associated with some types of NHL</li> <li>-these numbers remained elevated after excluding patients with autoimmune conditions or other conditions unrelated to NHL or CFS</li> <li>-some associations with other cancers, however significant after multiple comparisons</li> </ul>                                                                                                                   |
| Light et al. 2013   | CFS/CRF    | <ul style="list-style-type: none"> <li>-prostate cancer patients undergoing androgen-deprivation therapy with self-reported fatigue (PCF) and CFS patients were assessed for several potential biomarkers using RT-qPCR</li> <li>-PCF patients showed high expression than CFS patients of two genes involved in immune transcription (NR3C1 and TLR4), chemokine CXCR4, and SOD2 (superoxide dismutase)</li> <li>-CFS patients showed high metabolite detecting receptors (P2Rx7) and lower HSPA2</li> <li>-both CFS and PCR patients showed correlations with fatigue severity that were similar between the groups in a GABA-A receptor modulator</li> </ul> |
| Cleare 2004         | CFS        | <ul style="list-style-type: none"> <li>-many studies have reported CFS may be linked to alterations in the HPA axis</li> <li>-early prospective studies may indicate no changes in the early stages of the illness</li> </ul>                                                                                                                                                                                                                                                                                                                                                                                                                                   |

|                            |     |                                                                                                                                                                                                                                                                                                                                                                                                                                                                                                                                                                                                                                                                                                                                                                                                                                                                                     |
|----------------------------|-----|-------------------------------------------------------------------------------------------------------------------------------------------------------------------------------------------------------------------------------------------------------------------------------------------------------------------------------------------------------------------------------------------------------------------------------------------------------------------------------------------------------------------------------------------------------------------------------------------------------------------------------------------------------------------------------------------------------------------------------------------------------------------------------------------------------------------------------------------------------------------------------------|
|                            |     | <ul style="list-style-type: none"> <li>-changes may be reversed by modifying behaviour</li> <li>-this article presents the opinion that there is no actual change in the HPA axis of CFS patients that causes the disease, but that the etiology is multifactorial and play a role in "exacerbating or perpetuating symptoms late on in the course of the illness"</li> </ul>                                                                                                                                                                                                                                                                                                                                                                                                                                                                                                       |
| Holtorf 2011               | CFS | <ul style="list-style-type: none"> <li>-there is significant controversy regarding the relevance of HPA-axis dysfunction in CFS</li> <li>-some studies exist that have demonstrated a deficiency through stimulation tests</li> <li>-CFS dysfunction of the HPA axis is in the pituitary-hypothalamic level mostly according to studies</li> <li>-treatment of low physiologic doses of cortisol have been shown to be helpful in these cases, so administration of cortisol (&lt;15 mg) may be useful in treatment</li> </ul>                                                                                                                                                                                                                                                                                                                                                      |
| Papadopoulos & Cleare 2012 | CFS | <ul style="list-style-type: none"> <li>-there is considerable evidence of reduction of cortisol levels in some CFS patients, and these changes appear more pronounced in women than in men</li> <li>-the hypothalamic-pituitary-adrenal (HPA) axis may be to blame for this, along "with attenuated diurnal variation, enhanced negative feedback and blunted response to challenges"</li> <li>-low cortisol levels may contribute to symptoms and an overall worsened outcome</li> <li>-multidimensional etiological model is most probable</li> <li>-low cortisol appears late in the illness and may be moderated by exercise, existing mental health conditions such as depression, early trauma, and psychotropics</li> <li>-cortisol levels may be improved by cognitive behavioral therapy</li> <li>-better research design is required for future studies on CFS</li> </ul> |
| Vangeel et al. 2015        | CFS | <ul style="list-style-type: none"> <li>-study quantified DNA methylation in the 1F promoter region of NR3C1, a biomarker for HPA-dysfunction</li> <li>-overall methylation was lower in CFS patients compared to controls</li> <li>-no significant differences between patients with childhood trauma and those without trauma</li> <li>-results consistent with HPA-axis dysfunction in CFS patients</li> </ul>                                                                                                                                                                                                                                                                                                                                                                                                                                                                    |
| Houdenove et al. 2009      | CFS | <ul style="list-style-type: none"> <li>-narrative review</li> <li>-the etiology of CFS is poorly understood</li> <li>-although HPA axis dysfunction is common in CFS patients, it is unclear if it is causative or merely a consequence of the illness</li> <li>-HPA axis dysfunction is hypothesized to point to "neurobiological stress", imbalance between</li> </ul>                                                                                                                                                                                                                                                                                                                                                                                                                                                                                                            |

|                          |     |                                                                                                                                                                                                                                                                                                                                                                                                                                                             |
|--------------------------|-----|-------------------------------------------------------------------------------------------------------------------------------------------------------------------------------------------------------------------------------------------------------------------------------------------------------------------------------------------------------------------------------------------------------------------------------------------------------------|
|                          |     | <p>glucocorticoid and inflammatory signalling pathways, and a “cytokine-induced sickness”</p> <p>-these processes are hypothesized to underly CFS where HPA-axis dysfunction is present</p>                                                                                                                                                                                                                                                                 |
| Van Den Eede et al. 2008 | CFS | <p>-letter to the editor</p> <p>-there appears to be evidence for HPA-axis dysfunction in CFS, glucocorticoid negative feedback insensitivity, and blunted adrenocorticotropin response to stressors are the current and main findings</p>                                                                                                                                                                                                                  |
| Morris et al. 2017       | CFS | <p>-systematic review</p> <p>-considerable evidence of HPA-axis dysfunction in CFS</p> <p>-there is also evidence that neuro-immune and pro-oxidative processes are implicated in the pathophysiology of CFS</p> <p>-hypothesized that the above processes occur either as a consequence of HPA axis dysfunction or are causative</p> <p>-results indicate that these are not secondary processes to HPA axis dysfunction and are most likely causative</p> |
| Andrykowski et al. 2005  | CRF | <p>-study of female breast cancer patients undergoing adjuvant therapy</p> <p>-patients completed clinical interview on measures of fatigue, distress, coping, and quality of life</p> <p>-baseline incidence of CRF was 10%, and following treatment 26%</p> <p>-results support multifactorial etiology—patient scores were significantly different in relation to various parameters of the questionnaire</p>                                            |
| Bower 2007               | CRF | <p>-narrative review</p> <p>-the author considers the emerging evidence for inflammatory processes in CRF</p> <p>-evidence suggests that this occurs both during and after treatment</p> <p>-author identifies potential mechanisms for the inflammation, focusing on the HPA axis</p>                                                                                                                                                                      |
| Bower et al. 200         | CRF | <p>-epidemiological study on fatigue in a large sample of breast cancer survivors</p> <p>-breast cancer patients somewhat more fatigued than the general population overall</p> <p>-approximately one third of breast cancer survivors reported severe fatigue</p> <p>-symptoms included increased depression, pain, and sleep disturbances</p> <p>-depression and pain were the strongest indicators of fatigue severity</p>                               |

|                       |     |                                                                                                                                                                                                                                                                                                                                                                                                                                                                                                                                                                                                                                                            |
|-----------------------|-----|------------------------------------------------------------------------------------------------------------------------------------------------------------------------------------------------------------------------------------------------------------------------------------------------------------------------------------------------------------------------------------------------------------------------------------------------------------------------------------------------------------------------------------------------------------------------------------------------------------------------------------------------------------|
| Wang 2012             | CRF | <ul style="list-style-type: none"> <li>-narrative review of the possible mechanisms behind CRF</li> <li>-CRF is influenced by a number of factors, including the effect of tumor burden, cancer treatment, or other pathophysiological conditions</li> <li>-compelling research exists in the pro-inflammatory hypothesis of CFS induction, the involvement of serotonin, anemia, and lack of adenosine triphosphate</li> </ul>                                                                                                                                                                                                                            |
| Badawy et al. 2005    | CFS | <ul style="list-style-type: none"> <li>-study that assess the serotonin status of CFS patients</li> <li>-examined various parameters of tryptophan metabolism</li> <li>-free tryptophan was higher in CFS patients</li> <li>-total tryptophan ratio to CAA ratio was significantly different between patient groups</li> <li>-CAA was not significantly different between groups, however it was lower overall in men than in women</li> <li>-there appeared to be two subtypes of CFS patients: ones with normal and high serotonin status when covaried with age and gender</li> </ul>                                                                   |
| Morrow et al. 2003    | CRF | <ul style="list-style-type: none"> <li>-it is known that fatigue and depression typically occur together in cancer patients, which suggests a common underlying mechanism</li> <li>-cancer patients undergoing chemotherapy were assessed for fatigue</li> <li>-if fatigue was reported, patients were placed on a paroxetine hydrochloride daily dose (a selective serotonin reuptake inhibitor) or a placebo</li> <li>-the SSRI had no effect on the reduction of fatigue</li> <li>-there was a mean between the groups with respect to depression, however</li> <li>-authors hypothesize that serotonin may have no effect on fatigue levels</li> </ul> |
| Barsevick et al. 2012 | CRF | <ul style="list-style-type: none"> <li>-systematic review of CRF and issues in the investigation of biological mechanism</li> <li>-current research is beginning to incorporate biological and genetic perspectives of these experiences</li> <li>-evidence suggest that the HPA axis, serotonin, circadian rhythm, and metabolism may be involved, however further research is required to elucidate these connections</li> <li>-advances in understanding CRF will contribute to increased quality of life in patients</li> </ul>                                                                                                                        |
| Roscoe et al. 2005    | CRF | <ul style="list-style-type: none"> <li>a study using the same SSR as Morrow et al. 2003 on breast cancer patients undergoing chemotherapy</li> <li>-analysis showed that paroxetine managed to reduce depression effectively, however not fatigue</li> <li>-authors hypothesize that serotonin is not the primary mechanism of CRF fatigue</li> </ul>                                                                                                                                                                                                                                                                                                      |

|                       |      |                                                                                                                                                                                                                                                                                                                                                                                                                                                                                                                                                  |
|-----------------------|------|--------------------------------------------------------------------------------------------------------------------------------------------------------------------------------------------------------------------------------------------------------------------------------------------------------------------------------------------------------------------------------------------------------------------------------------------------------------------------------------------------------------------------------------------------|
| O'Higgins et al. 2018 | CRF  | <ul style="list-style-type: none"> <li>-narrative review</li> <li>-fatigue is a debilitating symptom of cancer</li> <li>-current research suggests that it is a multifactorial condition and likely involves immune dysfunction, muscular changes, and neuroendocrine modulation</li> <li>-some current hypotheses are presented, including HPA axis, disruption of circadian rhythm, serotonin dysregulation</li> <li>-authors explain different controversies surrounding these avenues of research</li> </ul>                                 |
| Dantzer et al. 2014   | CRF  | <ul style="list-style-type: none"> <li>-narrative review</li> <li>-the general pathophysiology of fatigue is not fully understood</li> <li>-however, studying chronic inflammatory diseases, cancers, and neuropathologies can help elucidate these mechanisms</li> <li>-there is convergent data from many different sources on the importance of inflammation in fatigue</li> <li>-neurological dysfunction may also be implicated</li> </ul>                                                                                                  |
| LayVoy et al. 2016    | CRF  | <ul style="list-style-type: none"> <li>-narrative review</li> <li>-cancer-related fatigue is a debilitating condition, as previously reviewed</li> <li>-authors discuss concepts such as the HPA axis, disruption of circadian rhythm, serotonin dysregulation</li> </ul>                                                                                                                                                                                                                                                                        |
| Liu et al. 2017       | CFS  | <ul style="list-style-type: none"> <li>-rat model of exercise-induced fatigue</li> <li>-study focuses on the involvement of serotonin in the manifestation of fatigue</li> <li>-increased serotonin in the CNS is important to the adjustment to chronic fatigue</li> <li>-serotonin plays an important role in exercise-induced fatigue</li> </ul>                                                                                                                                                                                              |
| Pinho et al. 2012     | RIBE | <ul style="list-style-type: none"> <li>-study to determine if measurable levels of bystander factors are present in esophageal carcinoma patients' urine, and to determine if serotonin levels play a role in RIBE</li> <li>-specifically, patients undergoing radiotherapy</li> <li>-some of the data suggested significant effect of serotonin molecular signalling after high doses of radiation from high dose rate intraluminal brachytherapy</li> <li>-further research required to determine if serotonin plays a role in RIBE</li> </ul> |
| Lyng et al. 2012      | RIBE | <ul style="list-style-type: none"> <li>-study to determine the importance of serum serotonin levels in the measurement of bystander cell death</li> </ul>                                                                                                                                                                                                                                                                                                                                                                                        |

|                        |                  |                                                                                                                                                                                                                                                                                                                                                                                                                                                                                                                                                                                                                                               |
|------------------------|------------------|-----------------------------------------------------------------------------------------------------------------------------------------------------------------------------------------------------------------------------------------------------------------------------------------------------------------------------------------------------------------------------------------------------------------------------------------------------------------------------------------------------------------------------------------------------------------------------------------------------------------------------------------------|
|                        |                  | <ul style="list-style-type: none"> <li>-significant reduction in cell survival obtained in HaCaT cells treated with medium from irradiated cells, however no difference was found between bovine serum batches</li> <li>-data suggest that serum serotonin does not play a role in the system used</li> </ul>                                                                                                                                                                                                                                                                                                                                 |
| Mothersill et al. 2010 | RIBE             | <ul style="list-style-type: none"> <li>-study to again confirm or refute importance of serum serotonin levels in generations of a bystander signal from cells <i>in vitro</i></li> <li>-serotonin level varied widely between batches</li> <li>-serum serotonin levels may affect ability to obtain a bystander signal and may explain different results between labs</li> </ul>                                                                                                                                                                                                                                                              |
| Curtis et al. 2018     | RIBE             | <ul style="list-style-type: none"> <li>-another study investigating the importance of serum serotonin concentration in bystander effects <i>in vitro</i></li> <li>-used the HaCaT cell lines and two types of HCT116 (transformed keratinocytes and intestinal epithelial cells, respectively)</li> <li>-serotonin-depleted media significantly increased cell survival in <i>TP53</i> wild-type cells</li> <li>-indicative of serotonin receptor heterogeneity that may underlie sensitivity to serum serotonin levels with respect to bystander responses</li> </ul>                                                                        |
| Kalanxhi et al. 2012   | RIBE             | <ul style="list-style-type: none"> <li>-study investigating the role of serotonin and p53 status in RIBE</li> <li>-medium transfer was used to assess responses in HCT116 and a breast cancer cell line, MCF-7</li> <li>-high serotonin conditions in donor cells promoted a significant increase in bystander responses, while low serotonin levels did not show any bystander effect</li> <li>-bystander effects can be induced in p53 null cell reporters with high enough serotonin concentrations (100 ng/mL)</li> <li>-results indicate that serotonin levels play a role in RIBE and there could be an interaction with p53</li> </ul> |
| Morin 1999             | Circadian Rhythm | <ul style="list-style-type: none"> <li>-narrative review paper</li> <li>-the suprachiasmatic nucleus controls the primary circadian clock in mammals</li> <li>-review of the circadian clock in mammals</li> <li>-the involvement of serotonin is not immediately obvious</li> <li>-there is conflicting information on whether serotonin affects the rhythm phase</li> <li>-further research is ongoing</li> </ul>                                                                                                                                                                                                                           |
| Ciarleglio et al. 2011 | Circadian Rhythm | <ul style="list-style-type: none"> <li>-narrative review paper</li> <li>-the molecular biology of circadian and serotonin systems are described</li> </ul>                                                                                                                                                                                                                                                                                                                                                                                                                                                                                    |



|                          |                  |                                                                                                                                                                                                                                                                                                                                                                                                                                                 |
|--------------------------|------------------|-------------------------------------------------------------------------------------------------------------------------------------------------------------------------------------------------------------------------------------------------------------------------------------------------------------------------------------------------------------------------------------------------------------------------------------------------|
|                          |                  | <ul style="list-style-type: none"> <li>-these two systems are interconnected at the molecular level</li> <li>-serotonin-circadian interactions in the brain may be implicated in various disorders, such as autism spectrum disorder, major depression, and seasonal affective disorder</li> </ul>                                                                                                                                              |
| Lee 2019                 | Circadian Rhythm | <ul style="list-style-type: none"> <li>-narrative review paper on insomnia and how serotonin receptors may be implicated in this disorder</li> <li>-suggested that insomnia is comorbid with several additional condition</li> <li>-various serotonin receptors have been identified as targets for sleep aids</li> <li>-others are potential future targets, as these have shown to be involved in sleep/wake cycles</li> </ul>                |
| Shan et al. 2020         | CFS              | <ul style="list-style-type: none"> <li>-a narrative review of the neurological symptoms of CFS</li> <li>-endothelial dysfunction is discussed and other possible mechanisms of pathogenesis</li> <li>-other mechanisms include impaired cerebral blood flow, increased intercranial pressure, and adrenergic hyperactivity</li> <li>-these may explain the symptoms of brain fog, headache, sleep disturbances, and hypersensitivity</li> </ul> |
| Tyron et al. 2004        | CFS              | <ul style="list-style-type: none"> <li>-study suggesting that some CFS symptoms are the same as those of a disrupted circadian rhythm</li> <li>-CFS patients show lower daytime activity overall and less regular activity-rest cycles compared to the control</li> <li>-the authors conclude that CFS may impair the circadian rhythm in these patients</li> </ul>                                                                             |
| Focan et al. 1986        | CRF              | <ul style="list-style-type: none"> <li>-a study showing that CEA and AFP, two tumor biomarkers, can be demonstrated in individuals who do not suffer from cancer</li> <li>-those with cancer exhibit a different circadian activity when compared to the initial group</li> </ul>                                                                                                                                                               |
| Reinberg & Halberg 1971) | Circadian Rhythm | <ul style="list-style-type: none"> <li>-various species are susceptible to chemicals that can interfere with the circadian rhythm and other biological rhythms</li> <li>-the effects of adrenal secretion in mice induced by ATHC are discussed</li> </ul>                                                                                                                                                                                      |
| Levin et al. 2005        | CRF              | <ul style="list-style-type: none"> <li>-study examining whether those with advanced non-small cell lung cancer exhibit disrupted circadian rhythms</li> <li>-33 patients were used in the study</li> <li>-patients during or shortly after chemotherapy had significantly more abnormal circadian rhythm</li> <li>-daily sleep/wake cycles are disturbed in these patients and greatly affect quality of life</li> </ul>                        |

|                           |     |                                                                                                                                                                                                                                                                                                                                                                                                                                                         |
|---------------------------|-----|---------------------------------------------------------------------------------------------------------------------------------------------------------------------------------------------------------------------------------------------------------------------------------------------------------------------------------------------------------------------------------------------------------------------------------------------------------|
| Sephton & Spiegel<br>2003 | CRF | <ul style="list-style-type: none"> <li>-narrative review on the biological mechanisms that underlie the psychosocial effects on the progression of cancer, focusing on neuroendocrine and immune circadian rhythms</li> <li>-various alterations to rhythm are discussed and potential psychosocial effects on tumor growth are also discussed</li> <li>-review of evidence the effect of circadian rhythm dysregulation on immune responses</li> </ul> |
| Mormont et al.<br>1996    | CRF | <ul style="list-style-type: none"> <li>-a study of the circadian rhythm of 30 patients with metastatic colorectal cancer</li> <li>-a wide inter-patient variability was observed</li> <li>-cancer patients appear to have altered rest-activity circadian rhythms</li> <li>-further research required to determine significance to prognosis</li> </ul>                                                                                                 |
| Singh et al. 1998         | CRF | <ul style="list-style-type: none"> <li>-a study of 25 breast cancer patients and 15 controls, specifically on the “circadian periodicity” of various urinary compounds</li> <li>-urinary corticoids were significantly different in breast cancer patients; these were elevated compared to controls</li> <li>-the degree of elevation was more pronounced in advanced case</li> <li>-mastectomy returned values closer to the control group</li> </ul> |
| Bower et al. 2005         | CRF | <ul style="list-style-type: none"> <li>-a small study on the cortisol rhythm and fatigue patterns in breast cancer survivors</li> <li>-fatigued survivors had a flatter cortisol slope than non-fatigued survivors</li> <li>-results suggest “a subtle dysregulation in hypothalamic–pituitary–adrenal axis functioning in breast cancer survivors with persistent fatigue”</li> </ul>                                                                  |
| Evengård et al.<br>2005   | CFS | <ul style="list-style-type: none"> <li>-narrative review of CFS and suspected underlying causes</li> <li>-causes may include immune activation, HPA axis dysfunction, and other dysfunction of other parts of the central nervous system</li> <li>-the disease is likely to be complex and one cause likely does not exist</li> </ul>                                                                                                                   |
| Roscoe et al. 2007        | CRF | <ul style="list-style-type: none"> <li>-narrative review on CRF</li> <li>-fatigue is common in cancer patients</li> <li>-symptomatology is discussed: headaches, lack of energy, malaise, disturbance of sleep, and drowsiness</li> <li>-it may occur as a consequence of the cancer itself or possibly treatment</li> </ul>                                                                                                                            |

|                       |                   |                                                                                                                                                                                                                                                                                                                                                                                                                                                                                                     |
|-----------------------|-------------------|-----------------------------------------------------------------------------------------------------------------------------------------------------------------------------------------------------------------------------------------------------------------------------------------------------------------------------------------------------------------------------------------------------------------------------------------------------------------------------------------------------|
|                       |                   | -quality of life is usually affected greatly                                                                                                                                                                                                                                                                                                                                                                                                                                                        |
| Mormont et al. 1998   | CRF               | <ul style="list-style-type: none"> <li>-a study of women with ovarian cancer and metastatic colorectal cancer, focusing on circadian rhythms and cortisol levels</li> <li>-the clinical value of a 2-timepoint estimation of serum cortisol was evaluated</li> </ul>                                                                                                                                                                                                                                |
| Petrovsky et al. 1998 | Circadian Rhythms | <ul style="list-style-type: none"> <li>-a study that measured IFN-gamma, TNF-alpha, IL-1, and IL12 production in 13 healthy volunteers over 24 hours</li> <li>-cytokines exhibited distinct diurnal rhythms and peaked in the early morning</li> <li>-pro-inflammatory cytokine rhythms may have therapeutic relevance</li> </ul>                                                                                                                                                                   |
| Kronfol et al. 1997   | Circadian Rhythms | <ul style="list-style-type: none"> <li>-a study that analyzed the blood samples of healthy volunteers over 24 hours</li> <li>-the group measured ACTH, cortisol, norepinephrine, and epinephrine</li> <li>-some biomarkers showed significant circadian rhythm, such as neutrophil percentage, CD4+ cells, CF56+ cells, number of total lymphocytes, among others</li> <li>-most of these markers are associated closely with the regulation of cortisol</li> </ul>                                 |
| Stephon et al. 2000   | CRF               | <ul style="list-style-type: none"> <li>-study of cortisol rhythms in those with metastatic breast cancer, with various parameters measured</li> <li>-cortisol slope was a predictor of survival up to 7 years after measurement</li> <li>-NK cell count was another predictor of survival</li> <li>-metastatic breast cancer patients whose cortisol rhythms are flattened appear to exhibit earlier mortality</li> <li>-immune biomarkers may be prognostic in metastatic breast cancer</li> </ul> |
| Touitou et al. 1996   | CRF               | <ul style="list-style-type: none"> <li>-a study of 33 breast and ovarian cancer patients and their blood serum profiles</li> <li>-most patients had "deeply altered cortisol circadian patterns"</li> <li>-the patients mostly exhibited erratic peaks and fluctuations, or a flattened response</li> <li>-no relationship with tumor antigens was found</li> <li>-these findings could be relevant to future therapies</li> </ul>                                                                  |
| DeFreitas et al. 1991 | CFS               | <ul style="list-style-type: none"> <li>-a study that suggests HTLV could be involved in CFS</li> <li>-patients were screened for the virus, and most patients were found to be positive for the antibodies</li> <li>-twenty from a control group were not positive for the viral antigens</li> </ul>                                                                                                                                                                                                |

|                        |         |                                                                                                                                                                                                                                                                                                                                                                                                                                                                                                            |
|------------------------|---------|------------------------------------------------------------------------------------------------------------------------------------------------------------------------------------------------------------------------------------------------------------------------------------------------------------------------------------------------------------------------------------------------------------------------------------------------------------------------------------------------------------|
| Kannian et al. 2010    | HTLVs   | <ul style="list-style-type: none"> <li>-a narrative review about the human T lymphotropic viruses, outlining the different subtypes</li> <li>-some of these viruses are associated with adult T cell leukemia and other diseases</li> </ul>                                                                                                                                                                                                                                                                |
| Roucoux & Murphy 2004  | HTLVs   | <ul style="list-style-type: none"> <li>-a narrative review about the human T lymphotropic virus subtype II</li> <li>-the virus has been linked to a few diseases, including HTLV-associated myelopathy/tropical spastic paraparesis</li> <li>-infection causes increased risk of arthritis, pneumonia, and bronchitis</li> </ul>                                                                                                                                                                           |
| Beilke et al. 2004     | HTLVs   | <ul style="list-style-type: none"> <li>-a study investigating the clinical outcomes and disease progression of patients coinfecting with HTLV-I and HTLV-II</li> <li>-coinfecting patients had greater neurological complications, infections, and hepatitis C, and other complications</li> </ul>                                                                                                                                                                                                         |
| Meeus et al. 2009      | CFS/CRF | <ul style="list-style-type: none"> <li>-a narrative review outlining the characteristic fatigue in CFS and cancer</li> <li>-there is a review of several molecular factors that may underlie immune dysfunction, such as NF-kB and RNase L</li> <li>-the natural killer cell hypothesis is discussed in this section</li> <li>-oxidative stress and excessive nitric oxide and their implication in both fatigue states is discussed</li> <li>-these abnormalities may link the two conditions</li> </ul>  |
| Noda et al. 2018a      | CFS     | <ul style="list-style-type: none"> <li>-a narrative review of the possible underlying causes of CFS</li> <li>-discussion of autonomic, immune, neuroendocrine, and central nervous systems are discussed along with neuroinflammation</li> <li>-the authors hypothesize that inflammation of microglia and astrocytes may be responsible for the immune state that leads to CFS</li> <li>-the authors describe cytokine signaling in these cells, along with extracellular serotonin signalling</li> </ul> |
| Ojo-Amaize et al. 1994 | CFS     | <ul style="list-style-type: none"> <li>-a study conducted on blood specimens from 50 healthy individuals and 50 patients of CFS, specifically for NK cell activity screening</li> <li>-results showed that low levels of NK activity are correlated with severity of CFS</li> <li>-these findings may be useful especially if confirmed by other groups with larger sample sizes</li> </ul>                                                                                                                |
| Broderick et al. 2010  | CFS     | <ul style="list-style-type: none"> <li>-a study of 16 cytokines in CFS patients and healthy controls</li> </ul>                                                                                                                                                                                                                                                                                                                                                                                            |

|                      |           |                                                                                                                                                                                                                                                                                                                                                                                                                                                                                                                                             |
|----------------------|-----------|---------------------------------------------------------------------------------------------------------------------------------------------------------------------------------------------------------------------------------------------------------------------------------------------------------------------------------------------------------------------------------------------------------------------------------------------------------------------------------------------------------------------------------------------|
|                      |           | <ul style="list-style-type: none"> <li>-the networks in CFS patients appeared to be different compared to healthy controls</li> <li>-there were highly attenuated immune responses in CFS according to some of these biomarkers</li> <li>-there was also indirect evidence of diminished NK cell responsiveness to IL-12 and lymphotoxin-alpha exposure</li> <li>-These findings may also help therapeutics and indicate IL-2, IFN-gamma, and TNF-alpha could be targets</li> </ul>                                                         |
| Brodrick et al. 2012 | CFS       | <ul style="list-style-type: none"> <li>-a small study of cytokine concentrations in plasma samples from 9 post-infection CFS patients and 12 recovered controls</li> <li>-results showed significant differences in IL-8 and IL-23 between groups</li> <li>-results suggest that "co-expression patterns in as few as 5 cytokines associated with Th17 function may hold promise as a tool for the diagnosis of post-infectious CFS"</li> </ul>                                                                                             |
| Pusztai et al. 2004  | CRF       | <ul style="list-style-type: none"> <li>-a study of 90 breast cancer patients undergoing paclitaxel chemotherapy</li> <li>-it was suspected that changes in the blood concentration of various interleukins is associated with fatigue, flu-like symptoms, and musculoskeletal symptoms</li> <li>-no difference in baseline cytokine levels between the groups</li> <li>-treatment schedule-dependent changes were found with 3 cytokines: IL6, 8, and 10</li> <li>-these also correlated with symptoms associated with treatment</li> </ul> |
| Hong et al. 1995     | Cytokines | <ul style="list-style-type: none"> <li>-an animal study investigating whole-body and midbrain irradiation of mice and its effects on cytokines in the brain</li> <li>-results showed that several cytokine concentrations were increased following irradiation</li> <li>-therefore, it was concluded that these cytokines play a role in the inflammatory response upon radiation exposure of the brain</li> </ul>                                                                                                                          |
| Hallahan et al. 1993 | Cytokines | <ul style="list-style-type: none"> <li>-a narrative review of the involvement of cytokines in radiation responses following exposure</li> <li>-remedying some of the harmful effects of radiation therapy can be done by attenuating the production of TNF, TGF-beta, and other cytokines</li> <li>-some cytokines are useful for cancer therapy, such as TNF-alpha which enhances killing of tumor cells</li> <li>-more research is required to understand cytokine signalling networks</li> </ul>                                         |

|                       |           |                                                                                                                                                                                                                                                                                                                                                                                                                                                                                                                                                                                                                                                                                                                                                                                                                                                                                                                                           |
|-----------------------|-----------|-------------------------------------------------------------------------------------------------------------------------------------------------------------------------------------------------------------------------------------------------------------------------------------------------------------------------------------------------------------------------------------------------------------------------------------------------------------------------------------------------------------------------------------------------------------------------------------------------------------------------------------------------------------------------------------------------------------------------------------------------------------------------------------------------------------------------------------------------------------------------------------------------------------------------------------------|
| Greenberg et al. 1993 | Cytokines | <ul style="list-style-type: none"> <li>-a study of cytokine levels (specifically IL-1) during external beam irradiation for prostate cancer</li> <li>-localized irradiation was found to cause increased fatigue and sleep requirement for patients</li> <li>-changes in serum IL-1 concentrations were also noted in the patient group</li> </ul>                                                                                                                                                                                                                                                                                                                                                                                                                                                                                                                                                                                        |
| Bianco et al. 1992    | Cytokines | <ul style="list-style-type: none"> <li>-phase I-II trial of pentoxifylline (PTX) in the downregulation of TNF-alpha production in those receiving bone marrow transplantation</li> <li>-overall, administration of PTX resulted in reduced morbidity and mortality in patients undergoing transplantation</li> <li>-future trials and directions are discussed, including randomized trials</li> </ul>                                                                                                                                                                                                                                                                                                                                                                                                                                                                                                                                    |
| Benzing et al. 1999   | Cytokines | <ul style="list-style-type: none"> <li>-an animal study of RGS7, a regulator of G-protein signalling, and the prevention of its degradation by TNF-alpha</li> <li>-this process requires activation of p38</li> <li>-TNF-alpha mediated upregulation of RGS7 may promote changes in central nervous system function upon infection of the CNS</li> </ul>                                                                                                                                                                                                                                                                                                                                                                                                                                                                                                                                                                                  |
| Raison et al. 2005    | Cytokines | <ul style="list-style-type: none"> <li>-a narrative review of interferon alpha and its use in medical conditions</li> <li>-adverse effects are discussed, including development of a confused state and depressive symptoms</li> <li>-discussion of the use of antidepressants for treatment of depression induced by interferon alpha</li> </ul>                                                                                                                                                                                                                                                                                                                                                                                                                                                                                                                                                                                         |
| Capuron et al. 2002   | Cytokines | <ul style="list-style-type: none"> <li>-another study of the major depression induced by interferon-alpha therapy</li> <li>-studies have previously shown that this effect may be attenuated by the antidepressant paroxetine</li> <li>-forty patients with malignant melanoma were given this antidepressant or a placebo and neuropsychiatric assessments were conducted at regular intervals</li> <li>-several symptoms appeared including fatigue, anorexia, and pain upon IFN-alpha therapy in a large proportion of patients; later in the disease, there was a significant increase in major depression in the IFN-alpha group</li> <li>-some symptoms, like depression, anxiety, and cognitive dysfunction were effectively treated by the drug, while fatigue and anorexia were less susceptible</li> <li>-data indicate that different mechanisms mediate the behavioural manifestations of cytokine-induced fatigue</li> </ul> |

|                      |           |                                                                                                                                                                                                                                                                                                                                                                                                                                                                                                                                                                                                                                        |
|----------------------|-----------|----------------------------------------------------------------------------------------------------------------------------------------------------------------------------------------------------------------------------------------------------------------------------------------------------------------------------------------------------------------------------------------------------------------------------------------------------------------------------------------------------------------------------------------------------------------------------------------------------------------------------------------|
| Desai et al. 2013    | Cytokines | <ul style="list-style-type: none"> <li>-a study analyzing the cytokine secretion profile of various human tumor cell lines upon gamma irradiation</li> <li>-there was considerable variation between the cell lines in the number and magnitude of secreted factors</li> <li>-secretion of some cytokines was found in all cell line secretions, like TNF-alpha, IL-6, and IL-8, while some were cell-line specific</li> <li>-there are similarities and differences in the basal and radiation-induced cytokine profile of tumor cell lines and these can influence the growth and survival of bystander cells</li> </ul>             |
| Pasi et al. 2010     | Cytokines | <ul style="list-style-type: none"> <li>-a study assessing the release of IL-6 and IL-8 from gamma-irradiated human glioblastoma cells</li> <li>-these two cytokines were found to be differentially modulated by ionizing radiation and likely coordinate the inflammatory microenvironment in the tumor</li> </ul>                                                                                                                                                                                                                                                                                                                    |
| Facoetti et al. 2006 | Cytokines | <ul style="list-style-type: none"> <li>-a study of the gamma radiation-induced bystander effect in glioblastoma cells, specifically relating to cytokine release and receptors</li> <li>-authors propose that cytokines could act as a radiation-induced bystander signal</li> <li>-secreted signals may promote certain outcomes in bystander cells, such as increased cell death</li> </ul>                                                                                                                                                                                                                                          |
| Mariotti et al. 2012 | Cytokines | <ul style="list-style-type: none"> <li>-a study seeking to elucidate the mechanisms by which bystander transmission works <i>in vitro</i></li> <li>-the level of cytokine secretion from human fibroblasts was detected with an ELISA assay</li> <li>-the effect of radiation was found to be reliant on the IL-6 pathway and shows the involvement of reactive oxygen species</li> <li>-data also seems to suggest that increased linear energy transfer may correlate with the efficiency of radiation-induced release of cytokines</li> </ul>                                                                                       |
| Myhill & Booth 2009  | CFS       | <ul style="list-style-type: none"> <li>-a study investigating biomarkers of mitochondrial dysfunction in CFS patients</li> <li>-71 CFS patients and 53 normal patients were used in the study</li> <li>-the "ATP profile test" was used to assess the level of ATP production in neutrophils, efficiency of oxidative phosphorylation, and other biochemical markers for cellular energy production</li> <li>-all patients except for one were found to have different combinations of metabolic lesions</li> <li>-authors conclude that this points to the broad applicability of the ATP profile test in diagnosis of CFS</li> </ul> |

|                       |      |                                                                                                                                                                                                                                                                                                                                                                                                                                                                                                                                                                                                                                                 |
|-----------------------|------|-------------------------------------------------------------------------------------------------------------------------------------------------------------------------------------------------------------------------------------------------------------------------------------------------------------------------------------------------------------------------------------------------------------------------------------------------------------------------------------------------------------------------------------------------------------------------------------------------------------------------------------------------|
| Naviaux et al. 2016   | CFS  | <ul style="list-style-type: none"> <li>-a study of the metabolic features of CFS, which used “broad-spectrum” metabolomics of serum samples from CFS patients</li> <li>-the data showed that the disease response was highly concerted and patients exhibited hypometabolism overall</li> <li>-future avenues of research are discussed</li> </ul>                                                                                                                                                                                                                                                                                              |
| Armstrong et al. 2015 | CFS  | <ul style="list-style-type: none"> <li>-another study of the metabolomics of CFS patients</li> <li>-researchers took 49 blood and urine samples total and these underwent spectroscopy; blood glucose was also tested along with lactate, urine pyruvate, and urine alanine—all of these indicated an inhibition of glycolysis</li> <li>-this appears to be indicative of dysfunctional metabolism in CFS patients and increased oxidative stress</li> </ul>                                                                                                                                                                                    |
| Sargent et al. 2002   | CFS  | <ul style="list-style-type: none"> <li>-a study of CFS patients and their VO<sub>2</sub>(max)</li> <li>-contrary to contemporaneous studies, it was found that this value did not differ between CFS and control groups when groups were age and gender matched</li> </ul>                                                                                                                                                                                                                                                                                                                                                                      |
| Germain et al. 2017   | CFS  | <ul style="list-style-type: none"> <li>-another study of energy metabolism in CFS patients, this time focusing on fatty acid synthesis</li> <li>-a small cohort of patients was used and the data revealed 74 metabolites which differed in their plasma signature in CFS patients compared to the control</li> <li>-the data point to several metabolic pathways, including taurine, glycerophospholipid, primary bile acid, glyoxylate, and dicarboxylate metabolism</li> <li>-ATP and ADP levels were also found to be affected, along with glucose and oxaloacetate</li> <li>-potential implications for diagnosis are described</li> </ul> |
| Thomas & Newton 2018  | CFS  | <ul style="list-style-type: none"> <li>-a narrative mini-review on the various metabolic abnormalities that have been detected in CFS</li> <li>-many studies over the years have attempted to identify biomarkers for the disease, both for diagnostic purposes and to help with determining appropriate treatments</li> <li>-several avenues of research are discussed, including immune dysregulation, mitochondrial dysfunction, and skeletal muscle acidosis</li> <li>-future directions for research are discussed</li> </ul>                                                                                                              |
| Martinez et al. 2010  | RIBE | <ul style="list-style-type: none"> <li>-a narrative review of reactive oxygen species (ROS) and their role as bystander signals</li> <li>-review of the mechanisms of oxidative damage and paradigm shift away from targeted DNA damage</li> </ul>                                                                                                                                                                                                                                                                                                                                                                                              |



|                    |      |                                                                                                                                                                                                                                                                                                                                                                                                                                                                                                                                                                                                                                |
|--------------------|------|--------------------------------------------------------------------------------------------------------------------------------------------------------------------------------------------------------------------------------------------------------------------------------------------------------------------------------------------------------------------------------------------------------------------------------------------------------------------------------------------------------------------------------------------------------------------------------------------------------------------------------|
|                    |      | <ul style="list-style-type: none"> <li>-oxidative metabolism and regulation of inflammation are linked</li> <li>-end of review provides potential methods that may be used for future investigations</li> </ul>                                                                                                                                                                                                                                                                                                                                                                                                                |
| Gorman et al. 2009 | RIBE | <ul style="list-style-type: none"> <li>-a study where researchers sought to elucidate the mechanisms that allow RIBE to produce genomic instability</li> <li>-the group wanted to examine if radiation and chemotherapy can induce genomic instability and focus on mitochondrial effects and generation of ROS</li> <li>-results demonstrate the radiation and chemotherapy bystander responses can induce genomic instability</li> <li>-results also showed that mitochondrial function is also affected</li> <li>-restoration of mitochondrial activity may rescue the genomic instability effect induced by RIE</li> </ul> |
